# Supplementary material
Source: publisher site journal article supplement (https://www.dovepress.com/article/481101)
Supplement: Supplementary file 1 [file 481101 Revised Supplementary Material 1-3.pdf › 481101 Revised Supplementary Material 1-3.pdf]

# Supplementary Material 1: uncropped Western blots (Figure 2)

Figure 2

(A) Submitted Figure 2A

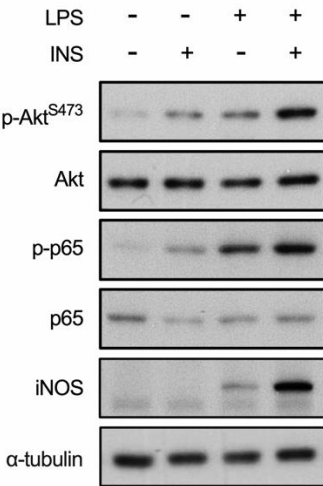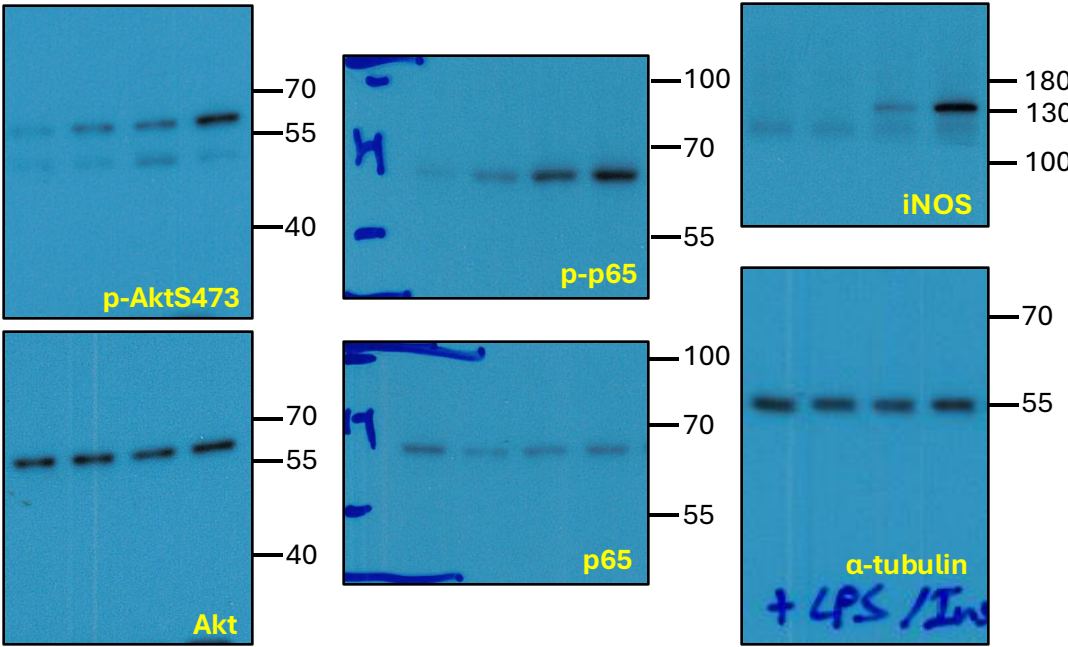

Note: Images displayed within the identical column were derived from the same membrane through the process of stripping and re-probing (arranged from top to bottom). The numerical values denote the molecular weights of protein ladders.

# Supplementary Material 2: uncropped Western blots (Figure 3)

Figure 3

(A) Submitted Figure 3A

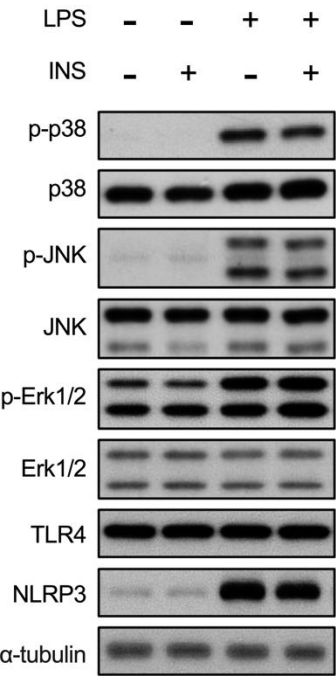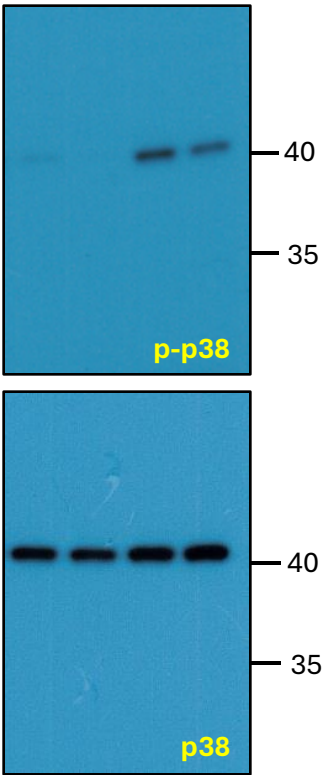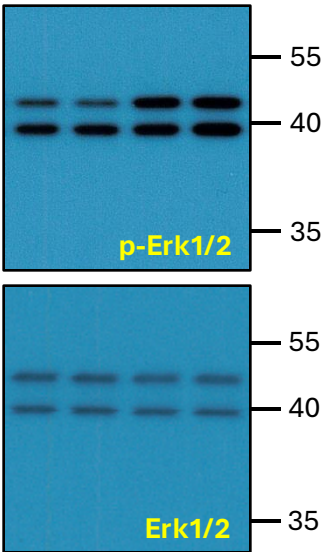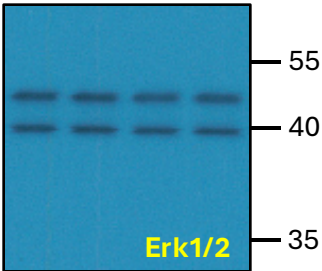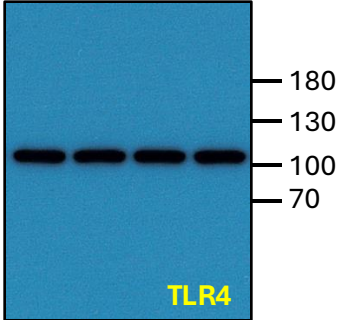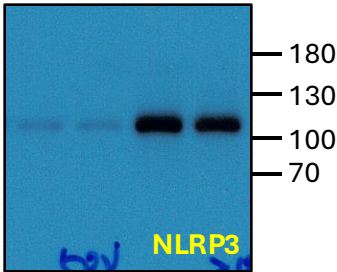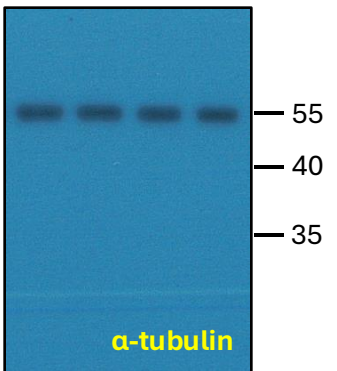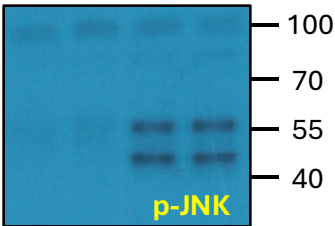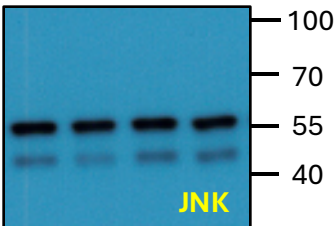

Note: Images displayed within the identical column were derived from the same membrane through the process of stripping and re-probing (arranged from top to bottom). The numerical values denote the molecular weights of protein ladders.

Supplementary Material 3: uncropped Western blots (Figure 5)

Figure 5

(C) Submitted Figure 5C

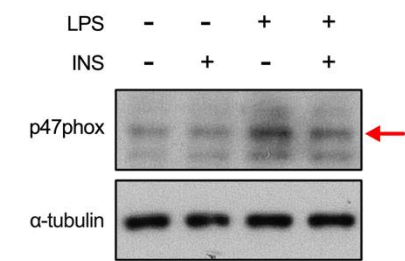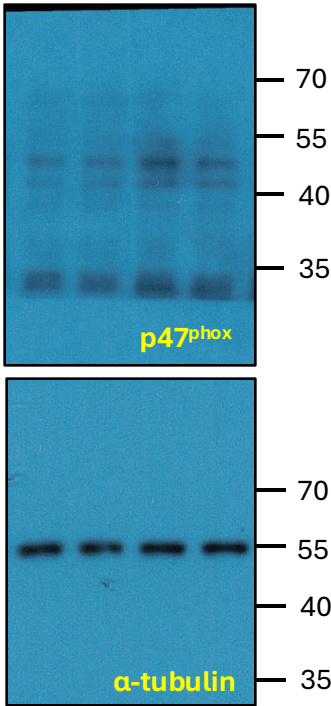

(E) Submitted Figure 5E

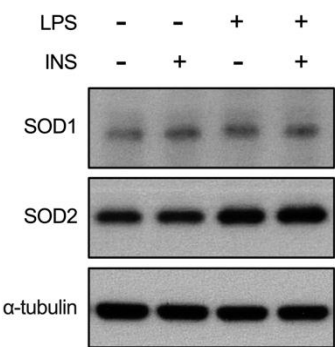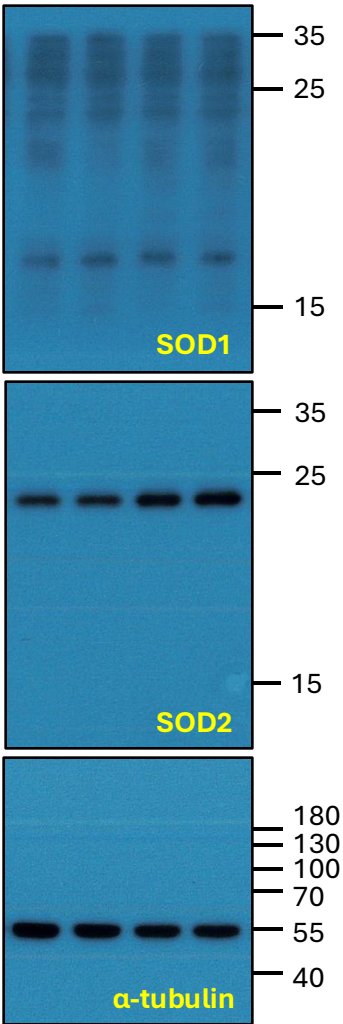

Note: Images displayed within the identical column were derived from the same membrane through the process of stripping and re-probing (arranged from top to bottom). The numerical values denote the molecular weights of protein ladders.
